# Supplementary material for: Genome-Wide Association Studies Identifies Seven Major Regions Responsible for Iron Deficiency Chlorosis in Soybean (Glycine max)
Source: PubMed Central journal article supplement (PMC4166409; doi:10.1371/journal.pone.0107469), 2014-09-16
Supplement: pone.0107469.s001.pdf [file pone.0107469.s001.pdf]

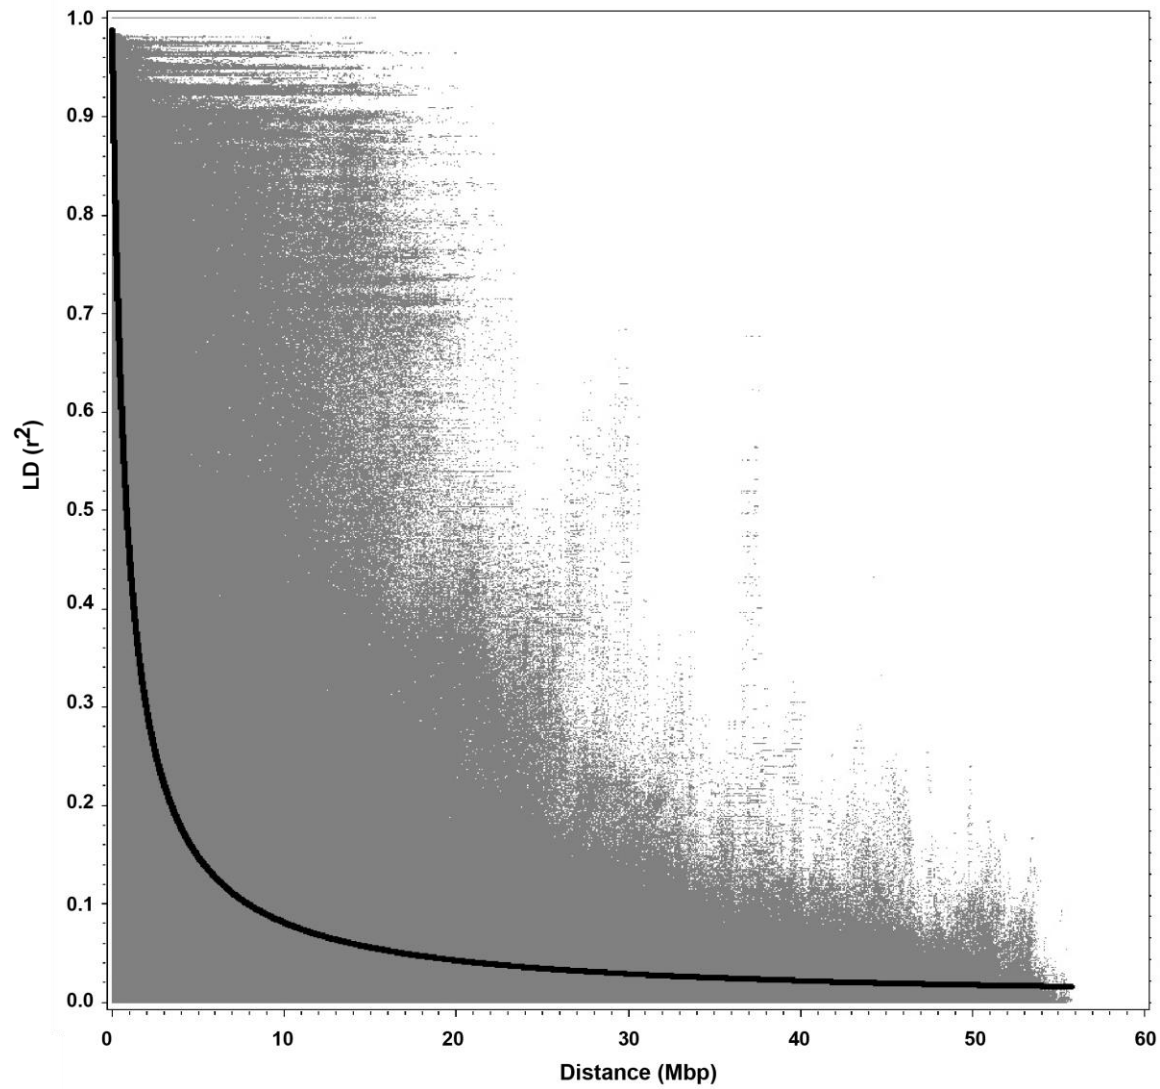

**Supplementary Figure 1:** Genome-wide linkage disequilibrium (LD) decay plot for the population. Linkage disequilibrium, measured as  $R^2$ , between pairs of polymorphic marker loci (intra-chromosomal comparisons) is plotted against the physical distance (Mbp).
